# Supplementary material for: From Pathophysiological Hypotheses to Case–Control Study Design: Resistance from Antibiotic Exposure in Community-Onset Infections
Source: MDPI journal article supplement (doi:10.3390/antibiotics11020201), 2022-02-04
Supplement: s1 [file s1]

**Table S1. Case-control studies assessing risk factors of resistance in community-onset or community-acquired bloodstream infections and urinary tract infections**

| First author, year           | Studied group    | Studied bacteria-resistance pair                                                       |
|------------------------------|------------------|----------------------------------------------------------------------------------------|
| Rodríguez-Baño, 2010 [1]     | CO-BSI           | ESBL-p <i>E. coli</i>                                                                  |
| Hsieh, 2010 [2]              | CO-BSI           | ESBL-p <i>E. coli</i>                                                                  |
| Park, 2011 [3]               | CO-BSI           | ESBL-p <i>E. coli</i>                                                                  |
| Park, 2014 [4]               | CO-BSI           | ESBL-p <i>E. coli</i>                                                                  |
| Kim, 2019 [5]                | CO-BSI           | ESBL-p <i>E. coli</i> or <i>Klebsiella</i> spp.                                        |
| Lee, 2017 [6]                | CO-BSI           | ESBL-p Enterobacteriaceae                                                              |
| Zahar, 2017 [7]              | CO-BSI           | ESBL-p Enterobacteriaceae                                                              |
| Lin, 2019 [8]                | CO-BSI           | 3GC-R <i>E. coli</i>                                                                   |
| Lee, 2014 [9]                | CO-BSI           | 3GC-R <i>E. coli</i> , <i>K. pneumoniae</i>                                            |
| Sung, 2012 [10]              | CA-BSI (CO-like) | 3GC-R <i>E. coli</i> , <i>Klebsiella</i> , <i>Enterobacter</i> , <i>Citrobacter</i>    |
| Gottesman, 2018 [11]         | CA-BSI           | ESBL-p <i>E. coli</i>                                                                  |
| Pedersen, 1999 [12]          | CA-BSI           | <i>E. Coli</i> R to ampicillin, sulphonamides, trimethoprim                            |
| Ortega, 2016 [13]            | CA-BSI           | 3GC-R <i>E. coli</i> or <i>Klebsiella</i> spp.                                         |
| Wi, 2018 [14]                | CO-BSI           | MRSA                                                                                   |
| Lim, 2014 [15]               | CO-BSI           | MRSA                                                                                   |
| Fan, 2014 [16]               | CO-UTI           | ESBL-p <i>E. coli</i>                                                                  |
| Pérez Heras, 2017 [17]       | CO-UTI           | ESBL-p <i>E. coli</i>                                                                  |
| Søgaard, 2017 [18]           | CO-UTI           | ESBL-p <i>E. coli</i>                                                                  |
| Tüzün, 2019 [19]             | CO-UTI           | ESBL-p <i>E. coli</i>                                                                  |
| Boix-Palop, 2017 [20]        | CO-UTI           | ESBL-p <i>K. pneumoniae</i>                                                            |
| Kung, 2015 [21]              | CO-UTI           | ESBL-p Enterobacteriaceae                                                              |
| Calbo, 2006 [22]             | CO-UTI (CA like) | ESBL-p <i>E. coli</i>                                                                  |
| Zhu, 2019 [23]               | CA-UTI (CO like) | ESBL-p <i>E. coli</i>                                                                  |
| Topaloglu, 2010 [24]         | CA-UTI (CO like) | ESBL-p <i>E. coli</i> or <i>Klebsiella</i> spp.                                        |
| Yilmaz, 2008 [25]            | CA/CO-UTI        | ESBL-p <i>E. coli</i> or <i>K. pneumoniae</i>                                          |
| Colodner, 2004 [26]          | NH-UTI           | ESBL-p <i>E. coli</i> or <i>Klebsiella</i> spp.                                        |
| Albaramki, 2019 [27]         | CA-UTI           | ESBL-p <i>E. coli</i> or <i>Klebsiella</i> spp.                                        |
| Guzmán, 2019 [28]            | CA-UTI           | ESBL-p <i>E. coli</i>                                                                  |
| Koksal, 2019 [29]            | CA-UTI           | ESBL-p <i>E. coli</i> or <i>Klebsiella</i> spp.                                        |
| Azap, 2010 [30]              | CA-UTI           | ESBL-p <i>E. coli</i>                                                                  |
| Rodríguez-Baño, 2008 [31]    | CA-UTI           | ESBL-p <i>E. coli</i>                                                                  |
| Castillo-Tokumori, 2017 [32] | CA-UTI           | ESBL-p <i>E. coli</i>                                                                  |
| Megged, 2014 [33]            | CA-UTI           | ESBL-p Enterobacteriaceae                                                              |
| Chervet, 2018 [34]           | CA-UTI (CO like) | ESBL-p Enterobacteriaceae                                                              |
| Jacmel, 2017 [35]            | CA-UTI (CO like) | ESBL-p Enterobacteriaceae                                                              |
| Brosh-Nissimov, 2019 [36]    | CA-UTI (CO like) | ESBL-p Enterobacteriaceae                                                              |
| Colodner, 2008 [37]          | CA-UTI (CO like) | <i>E. Coli</i> R to quinolones                                                         |
| Seija, 2014 [38]             | CA-UTI (CO like) | <i>E. Coli</i> R to fluoroquinolones                                                   |
| Killgore, 2004 [39]          | CA-UTI (CO like) | <i>E. Coli</i> R to ciprofloxacin                                                      |
| Chaniotaki, 2004 [40]        | CA-UTI (CO like) | <i>E. Coli</i> R to quinolones                                                         |
| Dromigny, 2005 [41]          | CA-UTI (CO like) | <i>E. Coli</i> R to ampicillin, amoxicillin, nalidixic acid, fluoroquinolones, TMP/SMX |
| Hillier, 2007 [42]           | CA-UTI (CO like) | All bacteria, R to ampicillin, TMP                                                     |
| Anesi, 2016 [43]             | CO-UTI           | 3GC-R Enterobacteriaceae                                                               |
| Lee, 2015 [44]               | CO-UTI           | AmpC $\beta$ -lactamase-producing Enterobacteriaceae                                   |

|                               |                  |                                                                                   |
|-------------------------------|------------------|-----------------------------------------------------------------------------------|
| Smithson, 2012 [45]           | CA-UTI           | <i>E. Coli</i> R to quinolones                                                    |
| Bosch-Nicolau, 2017 [46]      | CA-UTI (CO like) | All bacteria, R to amoxicillin-clavulanate, cefuroxime, cefotaxime, ciprofloxacin |
| Filiatrault et al., 2012 [47] | CA-UTI           | All bacteria, R to ciprofloxacin, TMP/SMX                                         |

**\*Table footnotes.** Abbreviations: 3GC = third generation cephalosporins; CA = community acquired; CO = community onset; CO-like = CA infection which definition actually corresponds to a CO infection; *E. coli* = *Escherichia coli*; ESBL-p = Extended-Spectrum  $\beta$ -Lactamase producing; *K. pneumoniae* = *Klebsiella pneumoniae*; MRSA = methicillin-resistant *Staphylococcus aureus*; NH = non-hospitalized; R = resistant; S = susceptible; SMX = sulfamethoxazole; TMP = trimethoprim.

**Table S2. Classifications, windows of exposure and collections of antibiotic use in case-control studies assessing risk factors of resistance in community-onset or community-acquired bloodstream infections and urinary tract infections**

|                                                      | Bacteremia, no. (total=15) | UTI, no. (total = 32) |
|------------------------------------------------------|----------------------------|-----------------------|
| <b>Studied antibiotic(s) and sub classifications</b> |                            |                       |
| Global use                                           | 13                         | 23                    |
| Beta lactam antibiotics                              | 3                          | 2                     |
| Penicillins                                          | 4                          | 12                    |
| Penicillins and beta-lactamase inhibitors            | 3                          | 6                     |
| Cefuroxime / 2nd generation cephalosporins           | 3                          | 5                     |
| Cephalosporins / 3rd generation cephalosporins       | 4                          | 17                    |
| Narrow/broad-spectrum penicillins                    | 0                          | 1                     |
| Any of ampicillin, ampicillin/sulbactam, cefalotin   | 0                          | 1                     |
| Carbapenems                                          | 1                          | 3                     |
| Mecillinam                                           | 0                          | 1                     |
| (Fluoro)quinolones                                   | 7                          | 20                    |
| Cotrimoxazole                                        | 0                          | 10                    |
| Nitrofurantoin                                       | 1                          | 7                     |
| Aminosides                                           | 1                          | 6                     |
| Macrolides                                           | 1                          | 5                     |
| Clindamycin                                          | 0                          | 1                     |
| Doxycyclin                                           | 0                          | 1                     |
| Fosfomycin                                           | 0                          | 3                     |
| Vancomycin                                           | 1                          | 2                     |
| Anti-anaerobic                                       | 1                          | 0                     |
| Metronidazole                                        | 0                          | 2                     |
| Narrow/broad-spectrum antibiotics                    | 0                          | 1                     |
| <b>Window of exposure</b>                            |                            |                       |
| 15 days                                              | 1                          | 0                     |
| 1 month                                              | 4                          | 5                     |
| 2 months                                             | 1                          | 0                     |
| 3 months                                             | 7                          | 17                    |
| 6 months                                             | 1                          | 4                     |
| 12 months                                            | 1                          | 3                     |
| “recent”                                             | 0                          | 1                     |
| within 31-365 days before the index date             | 0                          | 1                     |
| Not specified*                                       | 0                          | 1                     |
| <b>Collection</b>                                    |                            |                       |
| Analysis of medical records                          | 8                          | 19                    |
| Patient interviews                                   | 0                          | 6                     |
| Prospective evaluation without further details       | 3                          | 1                     |
| Delivered antibiotics in pharmacy databases          | 2                          | 2                     |
| Not specified*                                       | 2                          | 4                     |

**\*Table footnotes.**

\* Some papers did not specify the window of exposure [40] or the way antibiotic exposure was collected [4,15,21,22,25,40].

**Table S3. Definitions of community-onset and community-acquired infections in case-control studies assessing risk factors of resistance in bloodstream infections and urinary tract infections**

|                                                                                                                                                                                                                                                              |
|--------------------------------------------------------------------------------------------------------------------------------------------------------------------------------------------------------------------------------------------------------------|
| <b>Studies focusing on "Community Onset" bacteremia (total = 11)</b>                                                                                                                                                                                         |
| <48h (no. = 4)                                                                                                                                                                                                                                               |
| ≤48h + not transferred from other hospitals (no. =3)                                                                                                                                                                                                         |
| <48h + not hospitalized within 2 (no. =1) or 4 (no. =1) weeks before admission + not transferred from other hospitals                                                                                                                                        |
| Residing in a long-term healthcare facility, or community-acquired (no. = 1)                                                                                                                                                                                 |
| Presenting at the ED (no. = 1)                                                                                                                                                                                                                               |
| <b>Studies focusing on "Community Acquired" bacteremia (total = 4)</b>                                                                                                                                                                                       |
| ≤48h (no. = 1)                                                                                                                                                                                                                                               |
| ≤48h + not HCA (no. =2)                                                                                                                                                                                                                                      |
| Present or incubating at admission to hospital + exclusion of patients hospitalized within the past 30 days (no. = 1)                                                                                                                                        |
| <b>Studies focusing on "Community Onset" UTI (no. = 9)</b>                                                                                                                                                                                                   |
| ≤48h (no. = 3)                                                                                                                                                                                                                                               |
| Presenting at the ED (no. = 1)                                                                                                                                                                                                                               |
| <48h or outpatients (no. = 1)                                                                                                                                                                                                                                |
| Presenting at the ED, or outpatient practices, or within 72 hours of hospital admission from the ED/outpatient clinic (no. = 1)                                                                                                                              |
| Presenting at the ED, and no hospitalization or long-term care facility stay within the preceding month (no. = 2)                                                                                                                                            |
| Identified in a laboratory + referred by general practitioners (no. = 1)                                                                                                                                                                                     |
| <b>Study focusing on "Non hospitalized" UTI (no. = 1)</b>                                                                                                                                                                                                    |
| <b>Study focusing on "Community onset/community acquired" UTI without further definition (no. = 1)</b>                                                                                                                                                       |
| <b>Studies focusing on "Community Acquired" UTI (no. = 21)</b>                                                                                                                                                                                               |
| No exclusion of HCA infections (no. = 11): <48h (no. = 1), presenting at the ED (no. = 3), GP practices (no. = 1), identified in an ambulatory laboratory (no. = 1), outpatients (no. = 5)                                                                   |
| Exclusion of HCA infections (no. = 9): presenting at the ED or outpatients + not HCA (no. = 3), <48h + not HCA (no. = 1), <48h or ED + not HCA (no. =1), <= 72h + no hospitalization in the last two weeks prior to current UTI (no. = 1), not HCA (no. = 3) |
| Not specified (no. = 1) [30]                                                                                                                                                                                                                                 |

**\*Table footnotes.** Abbreviations: BSI = bloodstream infections; ED = emergency department; GP = general practitioner; HCA = healthcare associated; UTI = urinary tract infections.

**Table S4. Main results of case-control studies assessing antibiotic use as a risk factor of resistance in CO-BSI or CA-BSI to ESBL-producing Enterobacteriaceae, as a function of the control group**

| First author, year                                         | Studied group | Number of cases | Number of controls | Exposure window | AB identified as a resistance RF   | Odds ratio [95% CI]                                | Other antibiotics evaluated                                                                                            |
|------------------------------------------------------------|---------------|-----------------|--------------------|-----------------|------------------------------------|----------------------------------------------------|------------------------------------------------------------------------------------------------------------------------|
| <i>Controls = non-ESBL-p Enterobacteriaceae (no. = 10)</i> |               |                 |                    |                 |                                    |                                                    |                                                                                                                        |
| Kim, 2019 [5]                                              | CO-BSI        | 140             | 454                | 1 month         | $\beta$ -lactams or FQ             | 6.8 [2.3-20.2]                                     | ..                                                                                                                     |
| Lee, 2017 [6]                                              | CO-BSI        | 65              | 1,076              | 1 month         | Global use                         | 15.3 [7.7-61.4]                                    | ..                                                                                                                     |
| Park, 2011* [3]                                            | CO-BSI        | 50              | 100                | 3 months        | Global use                         | 4 [1.5-12.3]                                       | ..                                                                                                                     |
| Park, 2014† [4]                                            | CO-BSI        | 60              | 180                | 3 months        | 3GC                                | 16.4 [2.0-131.8]                                   | 1GC, 2GC, Penicillins, Quinolones                                                                                      |
| Rodríguez-Baño, 2010* [1]                                  | CO-BSI        | 95              | 188                | 2 months        | Global use<br>FQ<br>Cephalosporins | 2.7 [1.5-4.9]<br>4.7 [2.0-11.1]<br>10.3 [2.1-50.3] | Aminopenicillins                                                                                                       |
| Zahar, 2017 [7]                                            | CA-BSI        | 22              | 335                | 1 year          | ..                                 | ..                                                 | $\beta$ -Lactams, Cephalosporins, FQ, Carbapenems, Others, Macrolides, Nitrofurantoin, Aminoglycosides, Anti-anaerobic |
| Zahar, 2017 [7]                                            | HCA-BSI       | 36              | 289                | 1 year          | Anti-anaerobic                     | 3.51 [1.6-7.5]                                     | $\beta$ -Lactams, Cephalosporins, FQ, Carbapenems, Others, Macrolides, Nitrofurantoin, Aminoglycosides,                |
| Gottesman, 2018 [11]                                       | CA-BSI        | 12              | 267                | 3 months        | Quinolones                         | 7 [1.7-29.4]                                       | Global, Cefuroxime, Amoxicillin or penicillin, Amoxicillin/clavulanate                                                 |
| <i>Controls = CO-sepsis (no. = 1)</i>                      |               |                 |                    |                 |                                    |                                                    |                                                                                                                        |
| Rodríguez-Baño, 2010 [1]                                   | CO-BSI        | 95              | 190                | 2 months        | Global use<br>FQ                   | 1.9 [1.03-3.5]<br>2.8 [1.2-6.5]                    | Aminopenicillins, Cephalosporins                                                                                       |
| <i>Controls = CO-BSI (no. = 1)</i>                         |               |                 |                    |                 |                                    |                                                    |                                                                                                                        |
| Park, 2011* [3]                                            | CO-BSI        | 50              | 100                | 3 months        | Global use                         | 3.9 [1.3-11.5]                                     | ..                                                                                                                     |

**\*Table footnotes.** A study without multivariate analysis was excluded [2].\* = case-case(control)-control study, † = no information on how antibiotic use was evaluated. Abbreviations: 1GC, 2GC, 3GC = first, second, third generation cephalosporins; BSI = blood stream infections; CA = community acquired; CI = confidence interval; CO = community onset; CO-like = CA infection which definition actually corresponds to a CO infection; ESBL-p = Extended-Spectrum  $\beta$ -Lactamase producing; FQ = fluoroquinolones; RF = risk factor.

**Table S5. Main results of case-control studies assessing antibiotic use as a risk factor of resistance in CO-UTI or CA-UTI to ESBL-producing Enterobacteriaceae, as a function of the control group**

| First author, year                                         | Studied group    | Number of cases | Number of controls | Exposure window | AB identified as a resistance RF                      | Odds ratio [95% CI]                                                                  | Other antibiotics evaluated                                                                             |
|------------------------------------------------------------|------------------|-----------------|--------------------|-----------------|-------------------------------------------------------|--------------------------------------------------------------------------------------|---------------------------------------------------------------------------------------------------------|
| <i>Controls = non-ESBL-p Enterobacteriaceae (no. = 16)</i> |                  |                 |                    |                 |                                                       |                                                                                      |                                                                                                         |
| Søgaard, 2017* [18]                                        | CO-UTI           | 339             | 3,390              | Day -30 to -365 | Macrolides<br>Nitrofurantoin                          | 1.5 [1.1-2.2]<br>1.5 [1.1-2.3]                                                       | Mecillinam, Sulfamethizole, TMP, Narrow/ broad-spectrum penicillins, narrow/ broad-spectrum AB          |
| Tüzün, 2019 [19]                                           | CO-UTI           | 154             | 151                | 6 months        | Global use                                            | 2.3 [1.2-4.3]                                                                        | FQ, Cephalosporins, $\beta$ -lactams + $\beta$ -lactamase inhibitor                                     |
| Zhu, 2019 [23]                                             | CA-UTI (CO like) | 111             | 103                | 3 months        | Global use                                            | 4.2 [1.9-9.1]                                                                        | ..                                                                                                      |
| Boix-Palop, 2017* [20]                                     | CO-UTI           | 83              | 155                | 3 months        | Cephalosporins<br>Quinolones                          | 4.0 [1.8-9.2]<br>3.3 [1.4-7.9]                                                       | ..                                                                                                      |
| Kung, 2015+ [21]                                           | CO-UTI           | 62              | 376                | 3 months        | ..                                                    | ..                                                                                   | Penicillins with/without $\beta$ -lactamase inhibitor, Cephalosporins, FQ                               |
| Topaloglu, 2010 [24]                                       | CA-UTI (CO like) | 155             | 155                | 3 months        | ..                                                    | ..                                                                                   | Global use, Penicillins, 2GC, 3GC+4GC, Others, Combinations, Suppression with TMP/SMX or nitrofurantoin |
| Yilmaz, 2008+ [25]                                         | CA/CO-UTI        | 62              | 62                 | 3 months        | Quinolones<br>Cephalosporins                          | ..<br>..                                                                             | Global use, Aminopenicillins, Aminoglycosides, Aminopenicillins + $\beta$ -lactamase inhibitor, TMP/SMX |
| Colodner, 2004 [26]                                        | NH-UTI           | 100             | 77                 | 3 months        | Global use<br>2GC<br>3GC<br>Quinolones<br>Penicillins | 3.2 [1.8-5.9]<br>15.8 [1.7-143]<br>10.1 [4.2-24.0]<br>4.1 [1.8-9.0]<br>4.0 [1.6-9.0] | Macrolides, 1GC, TMP/SMX, Nitrofurantoin, Aminoglycosides                                               |
| Calbo, 2006+ [22]                                          | CO-UTI (CA like) | 19              | 55                 | 1 year          | Cefuroxime                                            | 21.4 [5.4-85.2]                                                                      | 3GC, Ciprofloxacin, Aminoglycosides                                                                     |

|                                                                             |        |                   |      |                     |                                                                                                      |                                                                                                     |                                                                             |
|-----------------------------------------------------------------------------|--------|-------------------|------|---------------------|------------------------------------------------------------------------------------------------------|-----------------------------------------------------------------------------------------------------|-----------------------------------------------------------------------------|
| Albaramki, 2019 [27]                                                        | CA-UTI | 77                | 77   | 3 months            | ..                                                                                                   | ..                                                                                                  | Global use                                                                  |
| Guzmán, 2019 [28]                                                           | CA-UTI | 21                | 82   | 3 months            | ..                                                                                                   | ..                                                                                                  | “First line $\beta$ -lactams” (ampicillin, ampicillin/sulbactam, cefalotin) |
| Koksal, 2019 [29]                                                           | CA-UTI | 66                | 112  | 3 months            | ..                                                                                                   | ..                                                                                                  | Global use, Penicillins, Cephalosporins, FQ, Fosfomycin, Nitrofurantoin     |
| Azap, 2010† [30]                                                            | CA-UTI | 51                | 464  | 3 months            | $\beta$ -lactams                                                                                     | 4·6 [2·0–10·7]                                                                                      | Global use, Quinolones                                                      |
| Rodríguez-Baño, 2008 [31]                                                   | CA-UTI | 122 (93% had UTI) | 244  | 3 months            | Global use<br>Aminopenicillins<br>FQ<br>2GC + 3GC                                                    | 2·9 [1·6–5·3]<br>2·8 [1·2–6·1]<br>1·9 [1·0–4·1]<br>3·2 [1·0–9·5]                                    | Fosfomycin, Tromethamine                                                    |
| Castillo-Tokumori, 2017 [32]                                                | CA-UTI | 67                | 105  | 1 month             | Global use                                                                                           | 3·1 [1·4–6·7]                                                                                       | Penicillins, Cephalosporins, FQ                                             |
| Megged, 2014 [33]                                                           | CA-UTI | 80                | 80   | 1 month             | Global use                                                                                           | 4 [1·6–10·4]                                                                                        | ..                                                                          |
| <i>Controls = uninfected patients from the general population (no. = 1)</i> |        |                   |      |                     |                                                                                                      |                                                                                                     |                                                                             |
| Søgaard, 2017* [18]                                                         | CO-UTI | 339               | 3390 | Day -30 to day -365 | Macrolides<br>Nitrofurantoin<br>Broad-spectrum<br>AB<br>Mecillinam<br>Sulfamethizole<br>Trimethoprim | 2·2 [1·3–3·8]<br>4·7 [1·9–11·2]<br>2·9 [1·1–7·7]<br>3·1 [1·3–7·8]<br>4·7 [2·4–9·2]<br>3·6 [1·6–8·0] | Narrow / broad-spectrum penicillins, narrow-spectrum AB                     |

**\*Table footnotes.** Studies without multivariate analysis were excluded [16,17,34–36].

\* = case-case(control)-control study, † = no information on how antibiotic use was evaluated, ‡ = no definition of CA infections.

Abbreviations: 1GC, 2GC, 3GC, 4GC = first, second, third, fourth generation cephalosporins; AB = antibiotics; CA = community acquired; CA-like = CO infection which definition actually corresponds to a CA infection; CI = confidence interval; CO = community onset; CO-like = CA infection which definition actually corresponds to a CO infection; ESBL-p = Extended-Spectrum  $\beta$ -Lactamase producing, FQ = fluoroquinolones; RF = risk factor; SMX = sulfamethoxazole; TMP = trimethoprim.

## References

1. Rodríguez-Baño J, Picón E, Gijón P, Hernández JR, Ruíz M, Peña C, Almela M, et al. Community-Onset Bacteremia Due to Extended-Spectrum  $\beta$ -Lactamase-Producing *Escherichia coli*: Risk Factors and Prognosis. *CLIN INFECT DIS*. 2010 Jan;50(1):40–8.
2. Hsieh C-J, Shen Y-H, Hwang K-P. Clinical Implications, Risk Factors and Mortality Following Community-onset Bacteremia Caused by Extended-spectrum  $\beta$ -lactamase (ESBL) and non-ESBL Producing *Escherichia coli*. *Journal of Microbiology, Immunology and Infection*. 2010 Jun;43(3):240–8.
3. Park SH, Choi S-M, Lee D-G, Kim J, Choi J-H, Kim S-H, et al. Emergence of Extended-Spectrum  $\beta$ -Lactamase-Producing *Escherichia coli* as a Cause of Community-Onset Bacteremia in South Korea: Risk Factors and Clinical Outcomes. *Microbial Drug Resistance*. 2011 Dec;17(4):537–44.
4. Park YS, Bae IK, Kim J, Jeong SH, Hwang S, Seo Y-H, et al. Risk Factors and Molecular Epidemiology of Community-Onset Extended-Spectrum  $\beta$ -Lactamase-Producing *Escherichia coli* Bacteremia. *Yonsei Med J*. 2014;55(2):467.
5. Kim M, Song K-H, Kim C-J, Choe PG, Park WB, Bang JH, et al. Clinical Prediction Score for Community-Onset Bloodstream Infections Caused by Extended-Spectrum Beta-Lactamase-Producing *Escherichia coli* and *Klebsiella* Species. *J Korean Med Sci*. 2019;34(14):e116.
6. Lee C-H, Chu F-Y, Hsieh C-C, Hong M-Y, Chi C-H, Ko W-C, et al. A simple scoring algorithm predicting extended-spectrum  $\beta$ -lactamase producers in adults with community-onset monomicrobial Enterobacteriaceae bacteremia: Matters of frequent emergency department users. *Medicine*. 2017 Apr;96(16):e6648.
7. Zahar J-R, Lesprit P, Ruckly S, Eden A, Hikombo H, Bernard L, et al. Predominance of healthcare-associated cases among episodes of community-onset bacteraemia due to extended-spectrum  $\beta$ -lactamase-producing Enterobacteriaceae. *International Journal of Antimicrobial Agents*. 2017 Jan;49(1):67–73.
8. Lin W-P. Prevalence of and risk factor for community-onset third-generation cephalosporin-resistant *Escherichia coli* bacteremia at a medical center in Taiwan. 2019;11.
9. Lee S, Han SW, Kim KW, Song DY, Kwon KT. Third-generation cephalosporin resistance of community-onset *Escherichia coli* and *Klebsiella pneumoniae* bacteremia in a secondary hospital. *Korean J Intern Med*. 2014;29(1):49.
10. Sung YK, Lee JK, Lee KH, Lee KT, Kang C-I. The Clinical Epidemiology and Outcomes of Bacteremic Biliary Tract Infections Caused by Antimicrobial-Resistant Pathogens: American Journal of Gastroenterology. 2012 Mar;107(3):473–83.
11. Gottesman B-S, Shitrit P, Katzir M, Chowers M. Antibiotic Exposure in the Community and Resistance Patterns of *Escherichia coli* Community-Acquired Bloodstream Infection. *Isr Med Assoc J*. 2018 Jun;20(6):382–4.
12. Pedersen G, Schønheyder HC, Steffensen FH, Sørensen HT. Risk of resistance related to antibiotic use before admission in patients with community-acquired bacteraemia. *Journal of Antimicrobial Chemotherapy*. 1999 Jan;43(1):119–26.
13. Ortega M, Soriano A, Marco F, Almela M, Martínez JA, Morata L, et al. Risk factors for the isolation of a third generation cephalosporin resistant strain in patients with community-acquired Enterobacteriaceae bacteraemia. *J Infect*. 2016 Feb;72(2):268–71.
14. Wi YM, Rhee JY, Kang CI, Chung DR, Song JH, Peck KR. Clinical predictors of methicillin-resistance and their impact on mortality associated with *Staphylococcus aureus* bacteraemia. *Epidemiol Infect*. 2018 Jul;146(10):1326–36.
15. Lim CJ, Cheng AC, Kong DC, Peleg AY. Community-onset bloodstream infection with multidrug-resistant organisms: a matched case-control study. 2014;9.
16. Fan N-C, Chen H-H, Chen C-L, Ou L-S, Lin T-Y, Tsai M-H, et al. Rise of community-onset urinary tract infection caused by extended-spectrum  $\beta$ -lactamase-producing *Escherichia coli* in children. *Journal of Microbiology, Immunology and Infection*. 2014 Oct;47(5):399–405.
17. Pérez Heras I, Sanchez-Gomez JC, Beneyto-Martin P, Ruano-de-Pablo L, Losada-Pinedo B. Community-onset extended-spectrum  $\beta$ -lactamase producing *Escherichia coli* in urinary tract



- infections in children from 2015 to 2016: Prevalence, risk factors, and resistances. *Medicine* (Baltimore). 2017 Dec;96(50):e8571.
18. Søgaard M, Heide-Jørgensen U, Vandenbroucke JP, Schønheyder HC. Risk factors for extended-spectrum  $\beta$ -lactamase-producing *Escherichia coli* urinary tract infection in the community in Denmark: a case-control study. *Clinical Microbiology and Infection*. 2017;9.
  19. Tüzün T, Sayın Kutlu S, Kutlu M, Kaleli İ. Risk factors for community-onset urinary tract infections caused by extended-spectrum  $\beta$ -lactamase-producing *Escherichia coli*. *Turk J Med Sci*. 2019 Aug 8;49(4):1206–11.
  20. Boix-Palop L, Xercavins M, Badía C, Obradors M, Riera M, Freixas N, et al. Emerging extended-spectrum  $\beta$ -lactamase-producing *Klebsiella pneumoniae* causing community-onset urinary tract infections: a case-control-control study. *International Journal of Antimicrobial Agents*. 2017 Aug;50(2):197–202.
  21. Kung C-H, Ku W-W, Lee C-H, Fung C-P, Kuo S-C, Chen T-L, et al. Epidemiology and risk factors of community-onset urinary tract infection caused by extended-spectrum  $\beta$ -lactamase-producing Enterobacteriaceae in a medical center in Taiwan: A prospective cohort study. *Journal of Microbiology, Immunology and Infection*. 2015 Apr;48(2):168–74.
  22. Calbo E, Romaní V, Xercavins M, Gómez L, Vidal CG, Quintana S, et al. Risk factors for community-onset urinary tract infections due to *Escherichia coli* harbouring extended-spectrum  $\beta$ -lactamases. *Journal of Antimicrobial Chemotherapy*. 2006 Apr 1;57(4):780–3.
  23. Zhu FH, Rodado MP, Asmar BI, Salimnia H, Thomas R, Abdel-Haq N. Risk factors for community acquired urinary tract infections caused by extended spectrum  $\beta$ -lactamase (ESBL) producing *Escherichia coli* in children: a case control study. *Infectious Diseases*. 2019 Dec 2;51(11–12):802–9.
  24. Topaloglu R, Er I, Dogan BG, Bilginer Y, Ozaltin F, Besbas N, et al. Risk factors in community-acquired urinary tract infections caused by ESBL-producing bacteria in children. *Pediatr Nephrol*. 2010 May;25(5):919–25.
  25. Yilmaz E, Akalin H, Özbey S, Kordan Y, Sinirtaş M, Gürcüoğlu E, et al. Risk Factors in Community-Acquired/Onset Urinary Tract Infections Due to Extended-Spectrum Beta-Lactamase-Producing *Escherichia coli* and *Klebsiella pneumoniae*. *Journal of Chemotherapy*. 2008 Oct;20(5):581–5.
  26. Colodner R, Rock W, Chazan B, Keller N, Guy N, Sakran W, et al. Risk Factors for the Development of Extended-Spectrum Beta-Lactamase-Producing Bacteria in Nonhospitalized Patients. *European Journal of Clinical Microbiology & Infectious Diseases*. 2004 Mar 1;23(3):163–7.
  27. Albaramki JH, Abdelghani T, Dalaeen A, Khdaire Ahmad F, Allassaf A, Odeh R, et al. Urinary tract infection caused by extended-spectrum  $\beta$ -lactamase-producing bacteria: Risk factors and antibiotic resistance. *Pediatrics International*. 2019 Nov;61(11):1127–32.
  28. Guzmán M, Salazar E, Cordero V, Castro A, Villanueva A, Rodolfo H, et al. Multidrug resistance and risk factors associated with community-acquired urinary tract infections caused by *Escherichia coli* in Venezuela. *biomedica*. 2019 May 1;39:96–107.
  29. Koksall E, Tulek N, Sonmezer MC, Temocin F, Bulut C, Hatipoglu C, et al. Investigation of risk factors for community-acquired urinary tract infections caused by extended-spectrum beta-lactamase *Escherichia coli* and *Klebsiella* species. *Investig Clin Urol*. 2019;60(1):46.
  30. Azap ÖK, Arslan H, Şerefhanoglu K, Çolakoğlu Ş, Erdoğan H, Timurkaynak F, et al. Risk factors for extended-spectrum  $\beta$ -lactamase positivity in uropathogenic *Escherichia coli* isolated from community-acquired urinary tract infections. *Clinical Microbiology and Infection*. 2010 Feb;16(2):147–51.
  31. Rodríguez-Baño J, Alcalá JC, Cisneros JM, Grill F, Oliver A, Horcajada JP, et al. Community Infections Caused by Extended-Spectrum  $\beta$ -Lactamase-Producing *Escherichia coli*. *Arch Intern Med*. 2008 Sep 22;168(17):1897.
  32. Castillo-Tokumori F, Irey-Salgado C, Málaga G. Worrisome high frequency of extended-spectrum beta-lactamase-producing *Escherichia coli* in community-acquired urinary tract infections: a

- case-control study. *International Journal of Infectious Diseases*. 2017 Feb;55:16–9.
33. Megged O. Extended-spectrum  $\beta$ -lactamase-producing bacteria causing community-acquired urinary tract infections in children. *Pediatr Nephrol*. 2014 Sep;29(9):1583–7.
  34. Chervet D, Lortholary O, Zahar J-R, Dufougeray A, Pilmis B, Partouche H. Antimicrobial resistance in community-acquired urinary tract infections in Paris in 2015. *Médecine et Maladies Infectieuses*. 2018 May;48(3):188–92.
  35. Jacmel L, Timsit S, Ferroni A, Auregan C, Angoulvant F, Chéron G. Extended-spectrum  $\beta$ -lactamase-producing bacteria caused less than 5% of urinary tract infections in a paediatric emergency centre. *Acta Paediatr*. 2017 Jan;106(1):142–7.
  36. Brosh-Nissimov T, Navon-Venezia S, Keller N, Amit S. Risk analysis of antimicrobial resistance in outpatient urinary tract infections of young healthy adults. *Journal of Antimicrobial Chemotherapy*. 2019 Feb 1;74(2):499–502.
  37. Colodner R, Kometiani I, Chazan B, Raz R. Risk Factors for Community-Acquired Urinary Tract Infection Due to Quinolone-Resistant *E. coli*. *Infection*. 2008 Feb;36(1):41–5.
  38. Seija V, Fratchez V, Ventura V, Pintos M, González M. Risk factors for community-acquired urinary tract infection caused by fluoroquinolone resistant *E. coli*. *Rev Chilena Infectol*. 2014 Aug;31(4):400–5.
  39. Killgore KM, March KL, Guglielmo BJ. Risk Factors for Community-Acquired Ciprofloxacin-Resistant *Escherichia Coli* Urinary Tract Infection. *Ann Pharmacother*. 2004 Jul;38(7–8):1148–52.
  40. Chaniotaki S, Giakouppi P, Tzouveleakis LS, Panagiotakos D, Kozanitou M, Petrikos G, et al. Quinolone resistance among *Escherichia coli* strains from community-acquired urinary tract infections in Greece. *Clinical Microbiology and Infection*. 2004 Jan;10(1):75–8.
  41. Dromigny JA, Nabeth P, Juergens-Behr A, Perrier-Gros-Claude JD. Risk factors for antibiotic-resistant *Escherichia coli* isolated from community-acquired urinary tract infections in Dakar, Senegal. *Journal of Antimicrobial Chemotherapy*. 2005 Jul 1;56(1):236–9.
  42. Hillier S, Roberts Z, Dunstan F, Butler C, Howard A, Palmer S. Prior antibiotics and risk of antibiotic-resistant community-acquired urinary tract infection: a case-control study. *Journal of Antimicrobial Chemotherapy*. 2007 Jul 1;60(1):92–9.
  43. Anesi JA, Lautenbach E, Nachamkin I, Garrigan C, Bilker WB, Wheeler M, et al. Clinical and Molecular Characterization of Community-Onset Urinary Tract Infections Due to Extended-Spectrum Cephalosporin-Resistant Enterobacteriaceae. *Infect Control Hosp Epidemiol*. 2016 Dec;37(12):1433–9.
  44. Lee C-H, Lee Y-T, Kung C-H, Ku W-W, Kuo S-C, Chen T-L, et al. Risk factors of community-onset urinary tract infections caused by plasmid-mediated AmpC  $\beta$ -lactamase-producing Enterobacteriaceae. *Journal of Microbiology, Immunology and Infection*. 2015 Jun;48(3):269–75.
  45. Smithson A, Chico C, Ramos J, Netto C, Sanchez M, Ruiz J, et al. Prevalence and risk factors for quinolone resistance among *Escherichia coli* strains isolated from males with community febrile urinary tract infection. *Eur J Clin Microbiol Infect Dis*. 2012 Apr;31(4):423–30.
  46. Bosch-Nicolau P, Falcó V, Viñado B, Andreu A, Len O, Almirante B, et al. A Cohort Study of Risk Factors That Influence Empirical Treatment of Patients with Acute Pyelonephritis. *Antimicrob Agents Chemother*. 2017 Dec;61(12):e01317-17, e01317-17.
  47. Filiatrault L, McKay RM, Patrick DM, Roscoe DL, Quan G, Brubacher J, et al. Antibiotic resistance in isolates recovered from women with community-acquired urinary tract infections presenting to a tertiary care emergency department. *CJEM*. 2012 Sep;14(5):295–305.
